# Supplementary material
Source: PubMed Central journal article supplement (PMC3123038)
Supplement: supp_C110.217893_jbc.C110.217893-1.pdf [file supp_C110.217893_jbc.C110.217893-1.pdf]

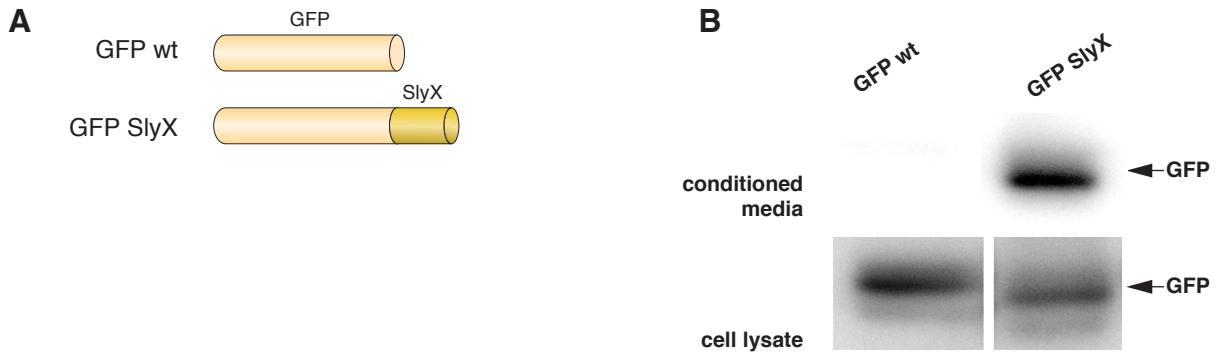

**SUPPLEMENTARY FIGURE 1. Addition of the SlyX domain increases secretion of GFP.** A, Schematic of the GFP and GFP-SlyX fusion constructs used to analyze the impact of the SlyX on GFP secretion. B, COS7 cells were transfected with wild type GFP, GFP-SlyX. After 48 hours, media were replaced by DMEM without supplements and incubated for 16 hrs. Conditioned media and corresponding cell lysates were subjected to immunoblotting with anti-GFP antibody. The presence of the SlyX domain of IDE strongly increased the secretion of GFP.

## Primers for cloning IDE constructs

| Primer name                  | Sequence                                                        |
|------------------------------|-----------------------------------------------------------------|
| IDEfl pcDNA4/myc-His forward | 5'-aat tgg atc cat gcg gaa cgg gct cgt-3'                       |
| IDEfl pcDNA4/myc-His reverse | 5'-att act cga gag agt ttt gca gcc atg aag tta a-3'             |
| tMTS pcDNA4/myc-His forward  | 5'-aat tgg atc cat gcg gaa cgg gct cgt g-3'                     |
| tMTS pcDNA4/myc-His reverse  | 5'-att act cga gaa gcc atg aag tta ata tgt ggt ttc acg ag-3'    |
| tCt pcDNA4/myc-His forward   | 5'-aat tgg atc cat gcg gaa cgg gct cgt g-3'                     |
| tCt pcDNA4/myc-His reverse   | 5'-att act cga gat agt gct tga atg tgt ttt tgg aac gc-3'        |
| tSlyX pcDNA4/myc-His forward | 5'-aat tgg atc cat gcg gaa cgg gct cgt-3'                       |
| tSlyX pcDNA4/myc-His reverse | 5'-att act cga gat gac tgg atg atg aag cgc aa-3'                |
| tNLS pcDNA4/myc-His forward  | 5'-aat tgg atc cat gcg gaa cgg gct cgt g-3'                     |
| tNLS pcDNA4/myc-His reverse  | 5'-att act cga gac agc aaa att ggc tgt ttg tca ttg-3'           |
| IDEfl pCMV forward           | 5'-aat tga att caa atg cgg aac ggg ctc gt-3'                    |
| IDEfl pCMV reverse           | 5'-att act cga gtc aga gtt ttg cag cca tga agt taa-3'           |
| tMTS pCMV forward            | 5'-aat tga att caa atg cgg aac ggg ctc gtg-3'                   |
| tMTS pCMV reverse            | 5'-att act cga gtc aag cca tga agt taa tat gtg gtt tca cga t-3' |
| tCt pCMV forward             | 5'-aat tga att caa atg cgg aac ggg ctc gtg-3'                   |
| tCt pCMV reverse             | 5'-att act cga gtc ata gtg ctt gaa tgt gtt ttt gga acg c-3'     |
| tSlyX pCMV forward           | 5'-aat tga att caa atg cgg aac ggg ctc gt-3'                    |
| tSlyX pCMV reverse           | 5'-att act cga gtc atg act gga tga tga agc gca a-3'             |
| dSlyX forward                | 5'-ttg cgc ttc atc atc cag ctg gag agc aga gta gaa-3'           |
| dSlyX reverse                | 5'-ttc tact ct gct ctc cag ctg gat gat gaa gcg caa-3'           |

## Sequencing primers

| Primer name       | Sequence                                  |
|-------------------|-------------------------------------------|
| BGH reverse       | 5'-tag aag gca cag tcg agg-3'             |
| mIDE2             | 5'-tgg ttt ttc tga ctg gat gat gaa gcg-3' |
| mIDE3             | 5'-gta gta cat ggc atg ctg gtg agg-3'     |
| mIDE4             | 5'-tcc att aag gtc agc att ttg cca ttt-3' |
| mIDE5             | 5'-gcc ctt tga ttt gag ttc tga caa cag-3' |
| mIDE6             | 5'-gac agc gtt cac ctc tct gtc ttt aca-3' |
| Seq SlyX Deletion | 5'-tct act acc aga cag aca tgc aga gc-3'  |

SUPPLEMENTARY TABLE1. Primers
